# Supplementary material
Source: PubMed Central journal article supplement (PMC7273743)
Supplement: js0c00106_si_001.pdf [file js0c00106_si_001.pdf]

# Supporting Information: Ultraviolet Photodissociation of tryptic peptide backbones at 213 nm

Lars Kolbowski<sup>1,2</sup>, Adam Belsom<sup>1,2</sup>, Juri Rappsilber<sup>\*,1,2</sup>

<sup>1</sup>Bioanalytics, Institute of Biotechnology, Technische Universität Berlin, 13355 Berlin, Germany

<sup>2</sup>Wellcome Trust Centre for Cell Biology, School of Biological Sciences, University of Edinburgh, Edinburgh EH9 3BF, United Kingdom

\*Corresponding author email address: juri.rappsilber@tu-berlin.de

## List of supporting information

Table S1: List of all analyzed *m/z* species (peptide sequence and charge state combination).

Figure S1: Overview of unique peptide spectrum matches (PSMs) found in the Dual MS2 datasets

Figure S2: Fragmentation analysis of 667 unique PSMs from 384 unique peptides from 4 PM dataset subjected to different UVPD excitation times and ETD, HCD and ETHcD for comparison.

Figure S3. Precursor charge state distributions.

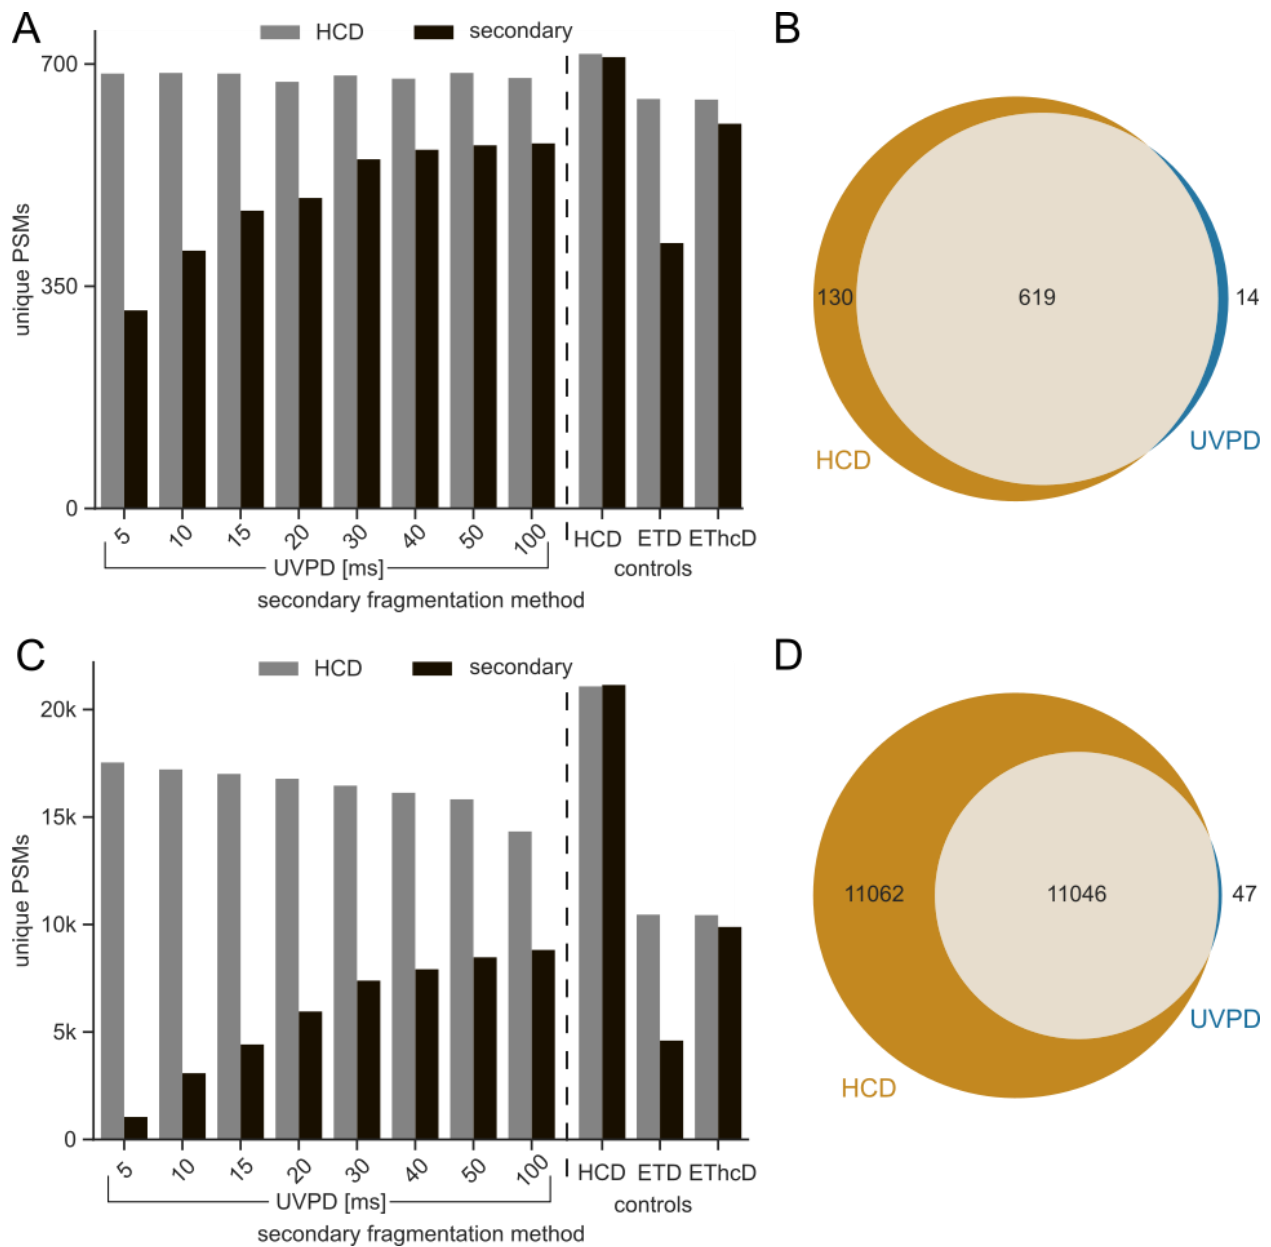

**Figure S1.** Overview of unique peptide spectrum matches (PSMs) found in the Dual MS2 datasets at 1% and 0.1% FDR for the 4 PM (A-B) and *E. coli* lysate (C-D) samples respectively. (A, C) Bar plots show the number of unique PSMs of the reference HCD scans in lighter color and the secondary fragmentation method scans HCD (positive control), UVPD 5-100 ms, ETD, and EThcD in darker color. (B, D) Venn diagrams showing the overlap of identifications from the HCD and UVPD scans from the HCD-UVPD Duals MS2 acquisitions.

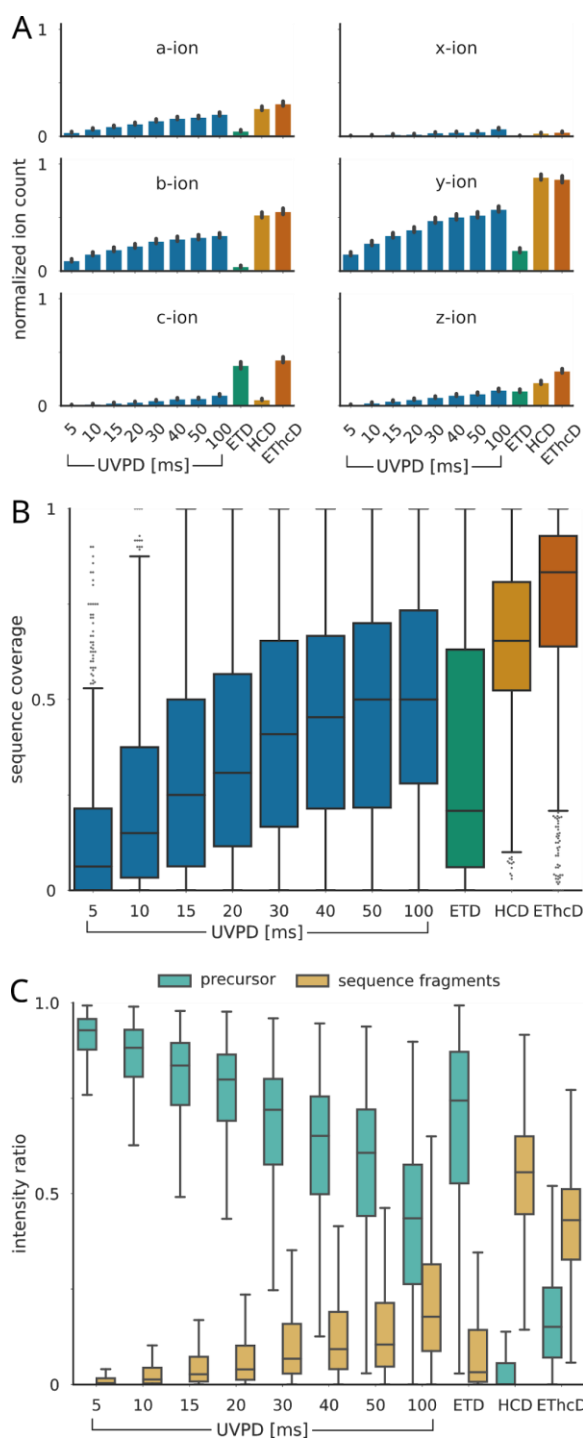

**Figure S2.** Fragmentation analysis of 667 unique PSMs from 384 unique peptides subjected to different UVPD excitation times and ETD, HCD and ETHcD for comparison. Data from 4 PM dataset. **(A)** Bar plots showing the sequence fragment ion type counts (normalized by peptide length). Error bars represent 0.95 confidence intervals. **(B)** Box plots showing sequence coverage of precursors. **(C)** Box plots of MS2 intensity ratios of remaining precursor and sequence fragments to total MS2 intensity. In all box plots whiskers extend to 1.5 interquartile range past the low and high quartiles.

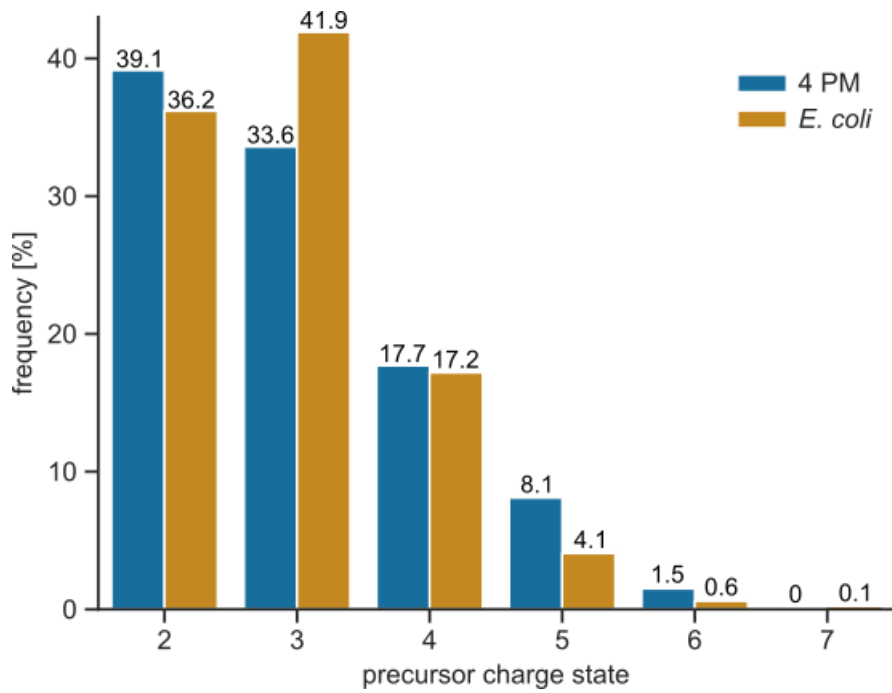

**Figure S3.** Precursor charge state distributions. Data shown are from the 4 PM and the *E. coli* lysate samples after 1%/0.1% FDR cutoff and only including PSMs that were seen in more than half of the fragmentation parameter duplicates.
